# Supplementary material for: Aminoglycosides, but not PTC124 (Ataluren), rescue nonsense mutations in the leptin receptor and in luciferase reporter genes
Source: PubMed Central journal article supplement (PMC5430635; doi:10.1038/s41598-017-01093-9), 2017-04-21
Supplement: 41598_2017_1093_MOESM1_ESM.pdf [file 41598_2017_1093_MOESM1_ESM.pdf]

## Supplementary Information

Aminoglycosides, but not PTC124 (Ataluren), rescue nonsense mutations in the  
leptin receptor and in luciferase reporter genes

Florian Bolze, Sabine Mocek, Anika Zimmermann and Martin Klingenspor\*

ZIEL - Institute for Food and Health, Technical University of Munich, Gregor-Mendel-Str. 2, Freising, Germany  
*and* Chair of Molecular Nutritional Medicine, Technical University of Munich, EKfZ - Else Kröner-Fresenius-  
Center for Nutritional Medicine, Gregor-Mendel-Str. 2, Freising, Germany

\*To whom correspondence should be addressed: Chair of Molecular Nutritional Medicine, Technische Universität München,  
Gregor-Mendel-Straße 2, Freising, Germany, Fax: +49 8161 71 2404, E-mail: [mk@tum.de](mailto:mk@tum.de) (M.Klingenspor)

## 1. Supplementary Table

**Supplementary Table 1. Oligonucleotides.** *Primer pairs 1-4:* nucleotides in bold indicate the overhang encoding the leptin receptor fragment. The PTCs are underlined. *Primer pairs 5-11:* Nucleotides in bold indicate mutated positions. Primer pairs 5 and 6 contain synonymous mutations for *HindIII* and *BglII* restriction sites, respectively. Underlined bases highlight the PTC except for pairs 9, 12 and 15 – here the restriction sites for cloning are indicated.

| Pair | Construct                                   |            | Primer sequence                                                                                                                              |
|------|---------------------------------------------|------------|----------------------------------------------------------------------------------------------------------------------------------------------|
| 1    | <i>mLepr</i> <sup>W31X</sup> - <i>PLuc</i>  | For<br>Rev | <b><u>G</u>AAAATTTGAAGACGCCAAAAACATAAAGAAAGGCCCGGCCATTCTATC</b><br><b><u>A</u>GGGAGACATGGTGGCTTTACCAACAGTACCGGAATGCCAAGC</b>                 |
| 2    | <i>mLepr</i> <sup>Y333X</sup> - <i>PLuc</i> | For<br>Rev | <b><u>A</u>ATTTCCAGAAGACGCCAAAAACATAAAGAAAGGCCCGGCCATTCTATC</b><br><b><u>A</u>CACAACCATGGTGGCTTTACCAACAGTACCGGAATGCCAAGC</b>                 |
| 3    | <i>mLepr</i> <sup>Y763X</sup> - <i>PLuc</i> | For<br>Rev | <b><u>A</u>AAGTCTGGAAGACGCCAAAAACATAAAGAAAGGCCCGGCCATTCTATC</b><br><b><u>A</u>ATCATCCATGGTGGCTTTACCAACAGTACCGGAATGCCAAGC</b>                 |
| 4    | <i>hLEPR</i> <sup>W31X</sup> - <i>PLuc</i>  | For<br>Rev | <b><u>G</u>AAGATTTGAAGACGCCAAAAACATAAAGAAAGGCCCGGCCATTCTATC</b><br><b><u>A</u>AGGAGTCATGGTGGCTTTACCAACAGTACCGGAATGCCAAGC</b>                 |
| 5    | <i>mLepr</i> - <i>b</i> <sup>W31X</sup>     | For<br>Rev | CCAATCTCTCCCT <b><u>G</u></b> AAAATTTAAGCTTTTTGTGGACCACCG<br>CGGTGGTCCACAAAAAGCTTAAATTT <b><u>T</u></b> CAGGGAGAGATTGG                       |
| 6    | <i>mLepr</i> - <i>b</i> <sup>Y333X</sup>    | For<br>Rev | CAAGATGTTGTG <b><u>T</u></b> AATTTCCACCCAAGATCTTGACTAGTG<br>CACTAGTCA <b><u>A</u></b> AGATCTTGGGTGGAAATTACACAACATCTTG                        |
| 7    | <i>mLepr</i> - <i>b</i> <sup>Y763X</sup>    | For<br>Rev | GTCACCTGATGAT <b><u>T</u></b> AAAGTCTGTTATATCTGG<br>CCAGATATAACAGACT <b><u>T</u></b> TAAATCATCAGGTGAC                                        |
| 8    | <i>hLEPR</i> - <i>b</i> <sup>W31X</sup>     | For<br>Rev | TGTCATATCCAATTA <b><u>C</u></b> CTTGAAGATTTAAGTTGTCTTGCATGC<br>GCATGCAAGACA <b><u>A</u></b> CTTAAATCT <b><u>T</u></b> CAAGGAGTAATTGGATATGACA |
| 9    | <i>STAT3-RE-phRG-b</i>                      | For<br>Rev | CACGCTAG <b><u>C</u></b> TGAATGCAATTGTTGTTGTTAACTTG<br>ACCCATGGTACCAACAGTACCGGAATGCC                                                         |
| 10   | <i>RLuc</i> <sup>W121X</sup>                | For<br>Rev | GGGCCACGACT <b><u>G</u></b> AGGGGCTTGTCTG<br>CAGACAAGCCCC <b><u>T</u></b> CAGTCGTGGCCC                                                       |
| 11   | <i>RLuc</i> <sup>W156X</sup>                | For<br>Rev | CCTGGGACGAG <b><u>T</u></b> GACCTGACATCGAGG<br>CCTCGATGTCAGG <b><u>T</u></b> CACTCGTCCCAGG                                                   |
| 12   | <i>secNLuc</i> ORF                          | For<br>Rev | <b><u>C</u></b> TTAGGGCCACCATGAACTCCTTCTCCACAAGCGCCTT<br><b><u>C</u></b> TCGAGTTACGCCAGAATGCGTTCGCACAGC                                      |
| 13   | <i>secNLuc</i> <sup>W40X</sup>              | For<br>Rev | TCGTTGGGGACT <b><u>G</u></b> ACGACAGACAGCCG<br>CGGCTGTCTGT <b><u>C</u></b> T <b><u>C</u></b> AGTCCCCAACGA                                    |
| 14   | <i>secNLuc</i> <sup>W162X</sup>             | For<br>Rev | TGTAACAGGGACCCTGT <b><u>G</u></b> AACGGCAACAAAATTATC<br>GATAATTTTGTGCGGTT <b><u>T</u></b> CA <b><u>C</u></b> AGGGTCCCTGTTACA                 |
| 15   | <i>hLEPR</i> - <i>b</i> ORF                 | For<br>Rev | <b><u>G</u></b> CGGCCGCACCATGATTTGTCAAAAATTCTGTG<br><b><u>A</u></b> AGCTTTACACAGTTAGGTCACACATCTTGTT                                          |

## 2. Supplementary Figures

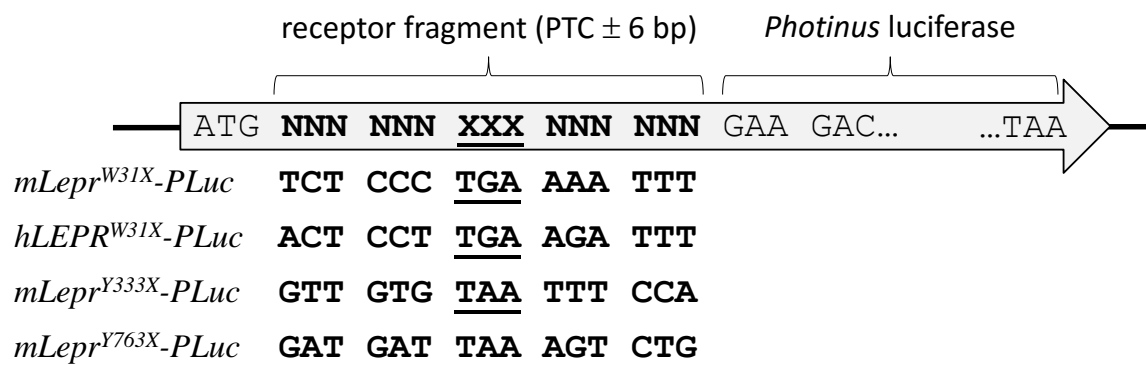

**Supplementary Fig. 1. Structure of LEPR-PLuc reporter fusion constructs.** The reporter constructs consisted of a 15 bp fragment of the leptin receptor gene and the full-length *Photinus* luciferase (PLuc). The premature termination codons (XXX) from W31X, Y333X and Y763X including  $\pm$  6 bp sequence context ( $\pm$  NNN NNN) were fused upstream of the coding sequence of *PLuc*.

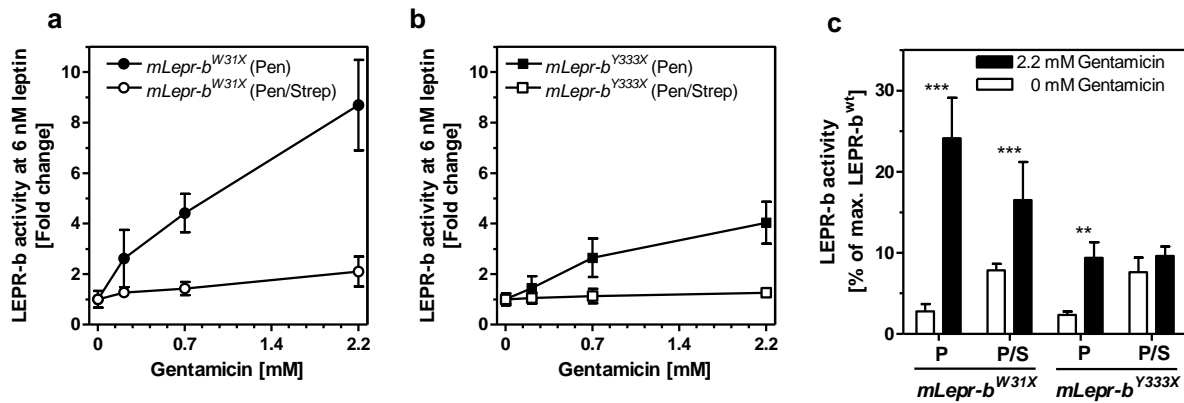

**Supplementary Fig. 2. Streptomycin in the cell culture medium lowers the efficacy of gentamicin to rescue *mLEPR-b*<sup>W31X</sup> and *mLEPR-b*<sup>Y333X</sup> signalling.** HEK293 cells were co-transfected with either *mLepr-b*<sup>W31X</sup> or *mLepr-b*<sup>Y333X</sup>-pcDNA3.1, STAT3-RE-PLuc and phRG-b. Cells were maintained in medium with penicillin (P) or with penicillin/streptomycin (P/S). Two days after the transfection, cells were treated for 24 h with rising concentrations of gentamicin and for the last 16 h in addition with 6 nM murine leptin (n=4, SD). Data in (a) and (b) are expressed in fold change relative to the receptor activity level without gentamicin (0 mM). In (c), data are shown in percent relative to the receptor activity measured in cells transfected with *Lepr-b*<sup>wt</sup>-pcDNA3.1 after stimulation with 6nM leptin. In (d), statistical significance between 0 and 2.2 mM gentamicin for each condition was assessed by t-tests with Bonferroni-Holm correction for multiple comparisons \*\*p<0.01; \*\*\*p<0.001.

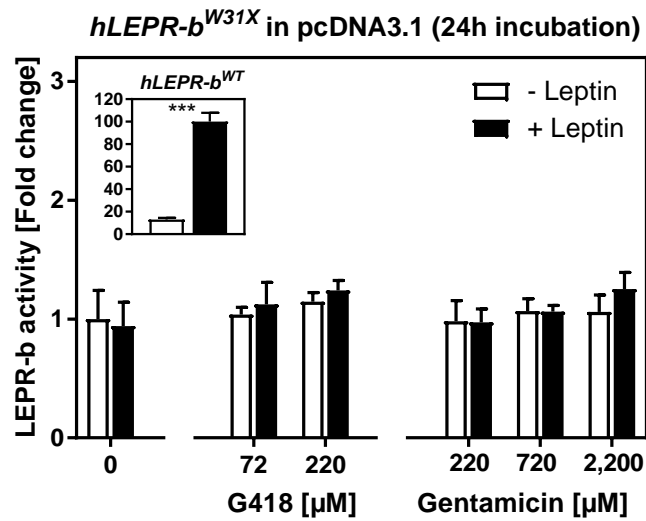

**Supplementary Fig. 3. G418 and gentamicin did not rescue hLEPR-b<sup>W31X</sup> signalling when expressed from pcDNA3.1 vector.** HEK293 cells were co-transfected with either the *hLEPR-b<sup>W31X</sup>*- (Inset) or *hLEPR-b<sup>WT</sup>* pcDNA3.1 overexpression construct, STAT3-RE-PLuc and phRG-b. Two days after the transfection, cells were treated for 24 h with the indicated concentrations of gentamicin or G418 and for the last 16 h in addition with 12.5 nM human leptin (n=3, SD). Statistical significance was assessed by t-tests with

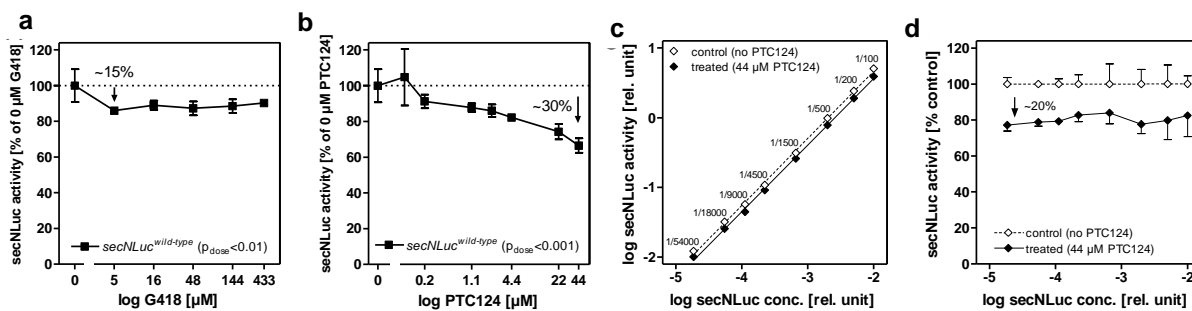**Supplementary Fig. 4. Effect of G418 and PTC124 on *secNLuc*<sup>wild-type</sup> activity during luminometry.**

Medium from HEK293 cells transiently expressing *secNLuc*<sup>wild-type</sup> was collected, mixed with NLuc assay buffer and supplemented with rising concentrations of either (a) G418 or (b) PTC124. *secNLuc*<sup>wild-type</sup> activities were quantified in a luminometer (n=4, SD). Medium containing *secNLuc*<sup>wild-type</sup> was diluted, mixed with assay buffer and constantly supplemented with 44  $\mu\text{M}$  PTC124 (c) or (d). Fractions in (c) indicate dilution steps (n=4, SD).

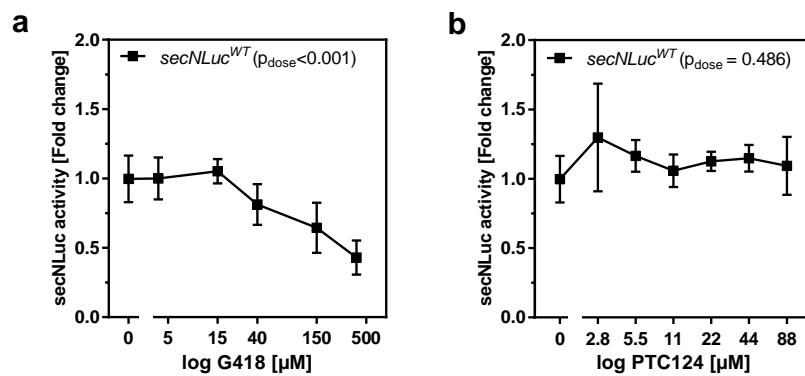

**Supplementary Fig. 5. Effect of G418 and PTC124 on *secNLuc*<sup>wild-type</sup> expression.** HEK293 cells were transiently transfected with the *secNLuc*<sup>wild-type</sup> overexpression construct. Two days after the transfection, cells were treated for 24 h with rising concentrations of (a) G418 or (b) PTC124. Cells were washed and luciferase activity was measured in lysates. P-values indicate the outcome from one-way ANOVA with the dose of the test compound as independent variable (n=4, SD).

### 3. Supplementary Results and Discussion

***The aminoglycoside antibiotic streptomycin lowers the efficacy of gentamicin to rescue mLEPR-b<sup>W31X</sup> and mLEPR-b<sup>Y333X</sup> signalling.*** Standard cell culture medium is often supplemented with penicillin and streptomycin to prevent contaminations. Here, we performed the signalling assay with medium containing 100 U/ml penicillin and 100 µg/ml (170 µM) streptomycin (Biochrom) or medium only supplemented with 200 U/ml penicillin.

The presence streptomycin reduced the efficiency of gentamicin to rescue mLEPR-b<sup>W31X</sup> and mLEPR-b<sup>Y333X</sup> signalling in HEK293 cells. When comparing the receptor activities measured in cells incubated with 6 nM leptin, only a doubling of mLEPR-b<sup>W31X</sup> signalling between 0 vs. 2.2 mM gentamicin was observed when medium contained streptomycin (Supplementary Fig. 2 a). Without streptomycin, the gentamicin effect on mLEPR-b<sup>W31X</sup> signalling at 6 nM leptin was more than 8-fold (Supplementary Fig. 2 a).

Streptomycin completely blocked the rescue effect of gentamicin on mLEPR-b<sup>Y333X</sup> (Supplementary Fig. 2 b). Only in the absence of streptomycin, gentamicin revived mLEPR-b<sup>Y333X</sup> activity (Supplementary Fig. 2 b). This outcome can be explained by the fact that medium with streptomycin might promote ‘basal’ read-through at PTCs (Supplementary Fig. 2 c). Additionally, streptomycin could compete with gentamicin for the ribosomal binding site and thereby impairs the effect of gentamicin (Supplementary Fig. 2 c). This outcome demonstrates the importance of optimal cell culture conditions to explore the activity of nonsense suppressor compounds.

***G418 and gentamicin do not to rescue hLEPR-b<sup>W31X</sup> when expressed from pcDNA3.1.*** Mouse and human full-length LEPR-b were expressed from different vector backbones (pcDNA3.1 vs. pDEST26) (Fig. 4). To align the expression system, we transferred *hLEPR-b<sup>wt</sup>* and *hLEPR-b<sup>W31X</sup>* into pcDNA3.1. The respective human ORFs - without the N-terminal His<sub>6</sub>-tag - were PCR amplified using the pDEST26 constructs as templates (primer pair 15 in Supplementary Table 1). The 3512 bp PCR products were cloned into pcDNA3.1 using the restriction enzymes *NotI* and *HindIII*. The functional efficiency of the pcDNA3.1 expression constructs was confirmed by the activation of hLEPR-b<sup>WT</sup> (inset Supplementary



Fig. 3). The expression of *hLEPR-b*<sup>W31X</sup> from pcDNA3.1 was not changing the susceptibility to nonsense suppression in comparison to the pDEST26 constructs (Fig. 4) since G418 and gentamicin did not rescue *hLEPR-b*<sup>W31X</sup> activity (Supplementary Fig. 3).

***Effect of G418 and PTC124 on secNLuc*<sup>wild-type</sup>**. To explore whether G418 and PTC124 have off-target effects on secNLuc, we cloned *secNLuc*<sup>wild-type</sup> ORF into pcDNA5/FRT/TO. In the first place, we tested whether G418 and PTC124 disturb the bioluminescence reaction catalysed by secNLuc<sup>wild-type</sup>. To do so, medium from HEK293 cells transiently expressing secNLuc<sup>wild-type</sup> was collected and 500-fold diluted in water. Ten  $\mu$ l of this dilution were mixed with 10  $\mu$ l NLuc assay buffer supplemented with raising amounts of G418 and PTC124 in 1  $\mu$ l. Both compounds triggered a significant reduction of the bioluminescence signal indicating an inhibitory effect on secNLuc activity especially in the presence of PTC124 (Supplementary Fig. 4 a and b). To further characterize the effect of PTC124 on the bioluminescence reaction, we added a constant concentration of 44  $\mu$ M PTC124 to different amounts of secNLuc<sup>wild-type</sup>. Therefore, medium containing secNLuc protein was diluted (100- to 54,000-fold) and mixed with 44  $\mu$ M PTC124. Independent from the secNLuc concentration, 44  $\mu$ M PTC124 caused a consistent ~20% depression of the luminescence signal (Supplementary Fig. 4 c and d).

In the next step, we tested whether G418 and PTC124 affect expression of secNLuc<sup>wild-type</sup> in transiently transfected HEK293 cells (e.g. via influencing transcription, transcript/protein stability or toxicity). Medium was supplemented with rising concentrations of G418 or PTC124. After 24 h incubation, cells were washed with PBS and lysed with 20  $\mu$ l NLuc assay buffer and 20  $\mu$ l water. This lysate was 10-fold diluted in water and 1  $\mu$ l of this mixture was added to 19  $\mu$ l NLuc assay buffer to quantify luminescence. We observed that PTC124 had no effect on secNLuc<sup>wild-type</sup> expression, whereas G418 induced a significant reduction most likely due to its toxic properties (Supplementary Fig. 5 a and b).

One may speculate that the inhibitory activity of PTC124 on the bioluminescence reaction (Supplementary Fig. 4) could mask a translational read-through effect. The consistent ~20% depression of the bioluminescence signal over a large secNLuc<sup>wild-type</sup> concentration range illustrates that only a

modest read-through activity of the same effect strength would be masked by PTC124s off-target effect during luminometry. Thus, we evaluate secNLuc as suitable reporter to study nonsense suppression.
